# Supplementary material for: Relationship between Long Chain n-3 Polyunsaturated Fatty Acids and Autism Spectrum Disorder: Systematic Review and Meta-Analysis of Case-Control and Randomised Controlled Trials
Source: Nutrients. 2017 Feb 19;9(2):155. doi: 10.3390/nu9020155 (PMC5331586; doi:10.3390/nu9020155)
Supplement: Supplementary file 1 [file nutrients-09-00155-s001.pdf]

# Supplementary Materials: Relationship between Long Chain *n*-3 Polyunsaturated Fatty Acids and Autism Spectrum Disorder: Systematic Review and Meta-Analysis of Case-Control and Randomised Controlled Trials

Hajar Mazahery, Welma Stonehouse, Maryam Delshad, Marlena C. Kruger, Cathryn A. Conlon, Kathryn L. Beck and Pamela R. von Hurst

**Table S1.** Study characteristics of open label trials and case-studies excluded from systematic literature review.

| Open label trials ( <i>n</i> = 6) |             |                         |                                                                                |                                                       |          |                                                |                                                                                                                                                                                                                                                                            |
|-----------------------------------|-------------|-------------------------|--------------------------------------------------------------------------------|-------------------------------------------------------|----------|------------------------------------------------|----------------------------------------------------------------------------------------------------------------------------------------------------------------------------------------------------------------------------------------------------------------------------|
| Reference and setting             | Age (years) | Sex distribution (M, F) | Sample size                                                                    | Intervention                                          | Duration | Outcome measure                                | Outcome                                                                                                                                                                                                                                                                    |
| Johnson (2010) [29] US            | 1–5         | NR                      | <i>n</i> = 10 (Intervention group), <i>n</i> = 13 (Healthy diet control group) | 0.4 g DHA                                             | 3 months | CBCL DBOM<br>Mullen's Scales of Early Learning | Significant improvement in externalising subscale of CBCL was reported in children in the DHA group. Significant improvement in affective subscale of CBCL was reported in children on the healthy diet. No other differences were reported. Well tolerated.               |
| Meguid (2008) [30] Egypt          | 3–11        | 18M, 12F                | <i>n</i> = 30                                                                  | 0.028 g EPA<br>0.012 g DHA<br>0.024 g LA<br>0.01 g AA | 3 months | CARS                                           | Significant improvement in whole blood omega-3 and -6 levels<br>Significant improvement in autistic behaviour (concentration, eye contact, language development, motor skills) in 20 children<br>DHA levels correlated negatively with CARS in 10 non-respondent children. |
| iri (2009) [31] Israel            | 4–7         | NR                      | <i>n</i> = 10, 1 drop out                                                      | 0.38 g EPA<br>0.18 g DHA                              | 12 weeks | CGI ATEC CPRS                                  | 8/9 children showed an average improvement of 33% as measured by ATEC and one child did not respond at all. No adverse effect.                                                                                                                                             |
| Ooi (2015) [32]<br>Singapore      | 7–18        | 36M, 5F                 | <i>n</i> = 41                                                                  | 0.19 g EPA<br>0.84 g DHA                              | 12 weeks | SRS CBCL                                       | Significant increase in percentage of EPA and DHA and significant decrease in AA/EPA ratio. Significant improvement in total (-21 units) and all subscales of SRS (2–7                                                                                                     |

|                                        |       |         |                        |                                  |         |                      |                                                                                                                                                                                                                                                                                                        |
|----------------------------------------|-------|---------|------------------------|----------------------------------|---------|----------------------|--------------------------------------------------------------------------------------------------------------------------------------------------------------------------------------------------------------------------------------------------------------------------------------------------------|
|                                        |       |         |                        | 0.144 g LA<br>0.066 g AA         |         |                      | units, $P < 0.01$ for all and medium to large effect sizes) and in social problem subscale of CBCL ( $P = 0.02$ and medium effect size). Change in RBC fatty acids correlated negatively with autism mannerism severity and higher baseline EPA was associated with a better response. Well tolerated. |
| Patrick (2005) [33] NR                 | 3-10  | NR      | $n = 22$ , 4 drop outs | 0.25 g omega-3<br>0.04 g omega-6 | 90 days | ABBLS                | Significant increase in language development and learning skills.                                                                                                                                                                                                                                      |
| Politi (2008) [34] Italy               | 18-40 | 15M, 4F | $n = 19$               | 0.93 g EPA + DHA                 | 6 weeks | RBC                  | No significant improvement in problem behaviours and their severity.                                                                                                                                                                                                                                   |
| <b>Case study (<math>n = 1</math>)</b> |       |         |                        |                                  |         |                      |                                                                                                                                                                                                                                                                                                        |
| Johnson (2003) [35] US                 | 11    | 1M      | $n = 1$ case-study     | 3 g omega-3 (0.54 EPA) *         | 4 weeks | Clinical observation | Significant improvement in anxiety, agitation and quality of life                                                                                                                                                                                                                                      |

\* The amount of other omega-3 fatty acids was not reported AA, arachidonic acid; ABBLS, Assessment of Basic Language and Learning Skills; ATEC, Autism Treatment Evaluation Checklist; CARS, Childhood Autism Rating Scale; CBCL, Childhood Behaviour Checklist; CPRS, Children's Psychiatric Rating Scale; DBOM, direct behaviour observation measure; DHA, docosahexanoic acid; EPA, eicosapentanoic acid; F, Female; LA, Linoleic acid; M, Male;  $n$ , Number; NR, not reported; RBC, Rossago Behavioural Checklist; US, the United States.

**Table S2.** Quality appraisal of included case-control studies †.

| Reference              | Inclusion & exclusion | Attrition |         | Exposure    |                       | Health outcome |              | Blinding | Comparability of study groups | Statistical significance of trend | Confounders               |                    | Total | Confounders not controlled for                                                                                                                                                                             |
|------------------------|-----------------------|-----------|---------|-------------|-----------------------|----------------|--------------|----------|-------------------------------|-----------------------------------|---------------------------|--------------------|-------|------------------------------------------------------------------------------------------------------------------------------------------------------------------------------------------------------------|
|                        |                       | Reported  | Reasons | Methodology | Repeated measurement* | Methodology    | Verification |          |                               |                                   | Participants demographics | Other risk factors |       |                                                                                                                                                                                                            |
| Al-Farsi (2013) [67]   | 1                     | 0         | 0       | 1           | 0                     | 0              | 0            | 1        | 1                             | 1                                 | 1                         | 0                  | 6     | Cases had lower frequency intake of high DHA foods, lower intake of ALA, lower energy intake, and shorter duration of breastfeeding (all were not considered in statistical analysis), medication use (NR) |
| Bell (2004) [66]       | 0                     | 0         | 0       | 1           | 0                     | 0              | 0            | 1        | 1                             | 1                                 | 0                         | 0                  | 4     | Age, sex, intake of LCPUFA, medication and supplement use (all NR)                                                                                                                                         |
| Bell (2010) [27]       | 1                     | 1         | 1       | 1           | 0                     | 1              | 0            | 1        | 1                             | 1                                 | 1                         | 0                  | 9     | Dietary intake of LCPUFA (NR)                                                                                                                                                                              |
| Brigandi (2015) [24]   | 1                     | 0         | 0       | 1           | 0                     | 1              | 0            | 1        | 0                             | 1                                 | 0                         | 0                  | 5     | Age, sex, dietary intake of LCPUFA, supplement and medication use                                                                                                                                          |
| Bu (2006) [28]         | 1                     | 0         | 0       | 1           | 0                     | 1              | 1            | 1        | 1                             | 1                                 | 1                         | 0                  | 8     | Dietary intake of LCPUFA, medication use                                                                                                                                                                   |
| El-Ansari (2011a) [50] | 1                     | 0         | 0       | 1           | 0                     | 1              | 1            | 1        | 1                             | 1                                 | 0                         | 0                  | 7     | Sex, dietary intake of LCPUFA, medication and supplement use                                                                                                                                               |
| El-Ansari (2011b) [65] | 1                     | 0         | 0       | 1           | 0                     | 1              | 1            | 1        | 1                             | 1                                 | 0                         | 0                  | 7     | Sex, dietary intake of LCPUFA, medication and supplement use                                                                                                                                               |
| Ghezzi (2013) [14]     | 1                     | 1         | 1       | 1           | 0                     | 0              | 1            | 1        | 1                             | 1                                 | 1                         | 0                  | 9     | Dietary intake of LCPUFA, medication use (NR)                                                                                                                                                              |

|                          |   |   |   |   |   |   |   |   |   |   |   |   |   |                                                         |
|--------------------------|---|---|---|---|---|---|---|---|---|---|---|---|---|---------------------------------------------------------|
| Jory (2016)<br>[51]      | 1 | 1 | 1 | 1 | 0 | 1 | 0 | 1 | 0 | 1 | 0 | 0 | 7 | Sex, dietary intake of LCPUFA                           |
| Meguid (2008)<br>[30]    | 1 | 0 | 0 | 1 | 0 | 1 | 1 | 1 | 1 | 1 | 1 | 0 | 7 | Dietary intake of LCPUFA, medication and supplement use |
| Mostafa<br>(2015) [26]   | 1 | 0 | 0 | 1 | 0 | 1 | 1 | 1 | 1 | 1 | 1 | 0 | 8 | Dietary intake of LCPUFA                                |
| Parletta (2016)<br>[52]  | 1 | 1 | 1 | 1 | 0 | 1 | 1 | 1 | 1 | 1 | 0 | 0 | 9 | Age, dietary intake of LCPUFA                           |
| Sliwinski<br>(2006) [49] | 1 | 0 | 0 | 1 | 0 | 1 | 1 | 1 | 1 | 1 | 1 | 0 | 8 | Supplement use, dietary intake of LCPUFA                |
| Tostes (2013)<br>[68]    | 1 | 1 | 0 | 1 | 0 | 1 | 0 | 1 | 1 | 1 | 1 | 0 | 8 | Medication use, dietary intake of LCPUFA                |
| Yui (2016) [53]          | 1 | 0 | 0 | 1 | 0 | 1 | 1 | 1 | 1 | 1 | 1 | 1 | 9 | -                                                       |

† Health Canada Quality Appraisal Tool for Observational Studies; A quality score of  $\geq 7$  was considered higher quality [47]. \* Measuring the exposure in duplicate or more is of no relevance for case-control studies and therefore all studies received a score of “0” for this criterion. Accordingly, a total score of 11 has been employed for this review instead of using a total score of 12. LCPUFA, long chain polyunsaturated fatty acids; NR, not reported.

**Table S3.** Quality appraisal of included RCTs †.

| Reference                   | Inclusion and exclusion | Group allocation        |               |                               |               | Blinding     |             | Attrition            |         | Intervention   |                  | Methodology to measure the health effect | Statistical analysis               |                    | Potential confounders | Total | Confounders not controlled for                                                               |
|-----------------------------|-------------------------|-------------------------|---------------|-------------------------------|---------------|--------------|-------------|----------------------|---------|----------------|------------------|------------------------------------------|------------------------------------|--------------------|-----------------------|-------|----------------------------------------------------------------------------------------------|
|                             |                         | Described as randomised | Randomisation | Randomisation appropriateness | Randomisation | Participants | Researchers | Reported numerically | Reasons | Type described | Amount described |                                          | Between group statistical analysis | Intention to treat |                       |       |                                                                                              |
| Amminger (2007) [36]        | 1                       | 1                       | 0             | 0                             | 0             | 1            | 1           | 1                    | 1       | 1              | 1                | 1                                        | 1                                  | 0                  | 0                     | 10    | Age, dietary intake or LCPUFA status, higher hyperactivity in omega-3 group, compliance (NR) |
| Bent (2011) [69]            | 1                       | 1                       | 1             | 1                             | 1             | 1            | 1           | 1                    | 1       | 1              | 0*               | 1                                        | 1                                  | 1                  | 0                     | 13    | Medical regimen                                                                              |
| Bent (2014) [70]            | 1                       | 1                       | 1             | 1                             | 1             | 1            | 1           | 1                    | 1       | 1              | 0*               | 1                                        | 1                                  | 1                  | 0                     | 13    | Sex (the distribution across groups NR), medical regimen, dietary intake or LCPUFA status    |
| Mankad (2015) [37]          | 1                       | 1                       | 1             | 1                             | 1             | 1            | 1           | 1                    | 1       | 1              | 1                | 1                                        | 1                                  | 1                  | 0                     | 14    | Gastrointestinal distress                                                                    |
| Voigt (2014) [55]           | 1                       | 1                       | 1             | 1                             | 1             | 1            | 1           | 1                    | 1       | 1              | 1                | 1                                        | 1                                  | 0                  | 0                     | 13    | Sex (the distribution across groups NR), medical regimen, compliance raw data (NR)           |
| Yui (2011 & 2012) * [54,57] | 1                       | 1                       | 1             | 0                             | 1             | 1            | 0           | 1                    | 1       | 1              | 1                | 1                                        | 1                                  | 0                  | 0                     | 11    | Age, compliance (NR)                                                                         |

† Health Canada Quality Appraisal Tool for Experimental Studies; A quality score of >7 was considered higher quality [47]. \* Different outcomes were reported in two different papers.

\*The intervention material was delivered in a pudding form – no information regarding the pudding ingredients is provided. LCPUFA, long chain polyunsaturated fatty acids; NR, not reported; RCTs, randomised controlled trials.

|                 | Random sequence generation (selection bias) | Allocation concealment (selection bias) | Blinding of participants and personnel (performance bias) | Blinding of outcome assessment (detection bias) | Incomplete outcome data (attrition bias) | Selective reporting (reporting bias) |
|-----------------|---------------------------------------------|-----------------------------------------|-----------------------------------------------------------|-------------------------------------------------|------------------------------------------|--------------------------------------|
| Amminger 2007   | ?                                           | ?                                       | ?                                                         | +                                               | +                                        | +                                    |
| Bent 2011       | +                                           | +                                       | +                                                         | +                                               | +                                        | +                                    |
| Bent 2014       | +                                           | +                                       | +                                                         | +                                               | +                                        | +                                    |
| Mankad 2015     | +                                           | +                                       | ?                                                         | +                                               | +                                        | +                                    |
| Voigt 2014      | +                                           | +                                       | ?                                                         | +                                               | ?                                        | -                                    |
| Yui 2011 & 2012 | ?                                           | +                                       | ?                                                         | +                                               | +                                        | +                                    |

**Figure S1.** Risk of bias table showing judgments on each risk factor for each primary study included in both meta-analysis and overall interpretation. + = low risk (green); ? = unclear risk (yellow); - = high risk (red.).
